# Supplementary material for: Approaches to nanostructure control and functionalizations of polymer@silica hybrid nanograss generated by biomimetic silica mineralization on a self-assembled polyamine layer
Source: publisher site journal article supplement (doi:10.3762/bjnano.2.84), 2011-11-23
Supplement: Additional file 1 [file 2190-4286-2-84-S1.pdf]

## Supporting Information

for

# **Approaches to nanostructure control and functionalizations of polymer@silica hybrid nanograss surface generated by biomimetic silica mineralization on a self-assembled polyamine layer**

Jian-Jun Yuan<sup>1</sup> and Ren-Hua Jin<sup>\*1,2</sup>

Address: <sup>1</sup>Synthetic Chemistry Lab., Kawamura Institute of Chemical Research, 631 Sakado, Sakura, 285-0078 Japan and <sup>2</sup>CREST-JST, 631 Sakado, Sakura, Chiba 285-0078, Japan

\* Corresponding author

Correspondence and requests for materials should be addressed to R.H.J

(Tel:+81-43-498-4104, Fax:+81-43-498-2202, [jjin@kicr.or.jp](mailto:jjin@kicr.or.jp))

## **Additional figures**

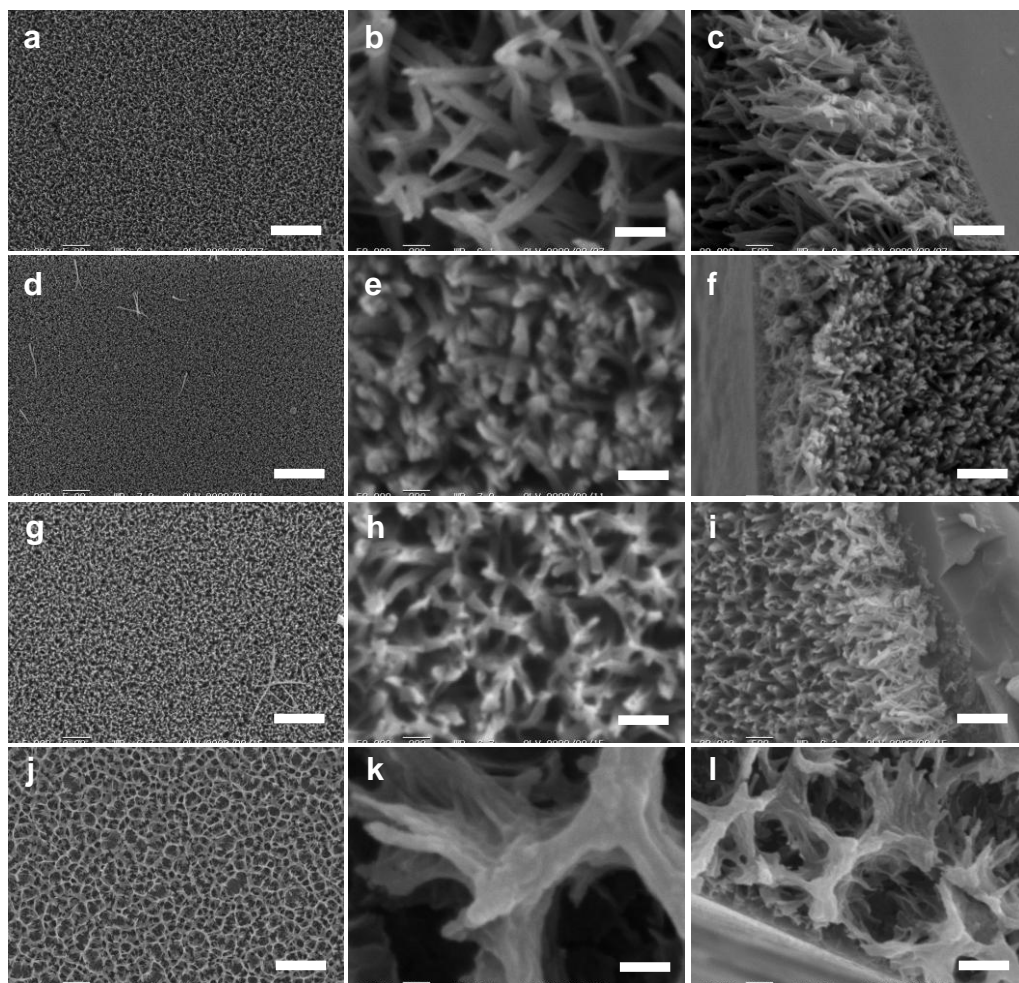

**Figure S1:** SEM images of LPEI@silicas nanoglass surface obtained by using the silica sources of MS51 with different concentrations: 50 vol % (3 mL MS51 and 3 mL water; a–c); 3.3 vol % (0.5 mL MS51 and 15 mL water; d–f); 0.25 vol % (0.25 mL MS51 in 100 mL water, g–i) and 0.1 vol % (0.1 mL MS51 in 100 mL water, j–l). The LPEI concentration is 5.0 wt % and the silica deposition was conducted at room temperature for 40 min. The bars are 10  $\mu\text{m}$  for a, d, g and j; 400 nm for b, e, h and k, 1  $\mu\text{m}$  for c, f, i and l.

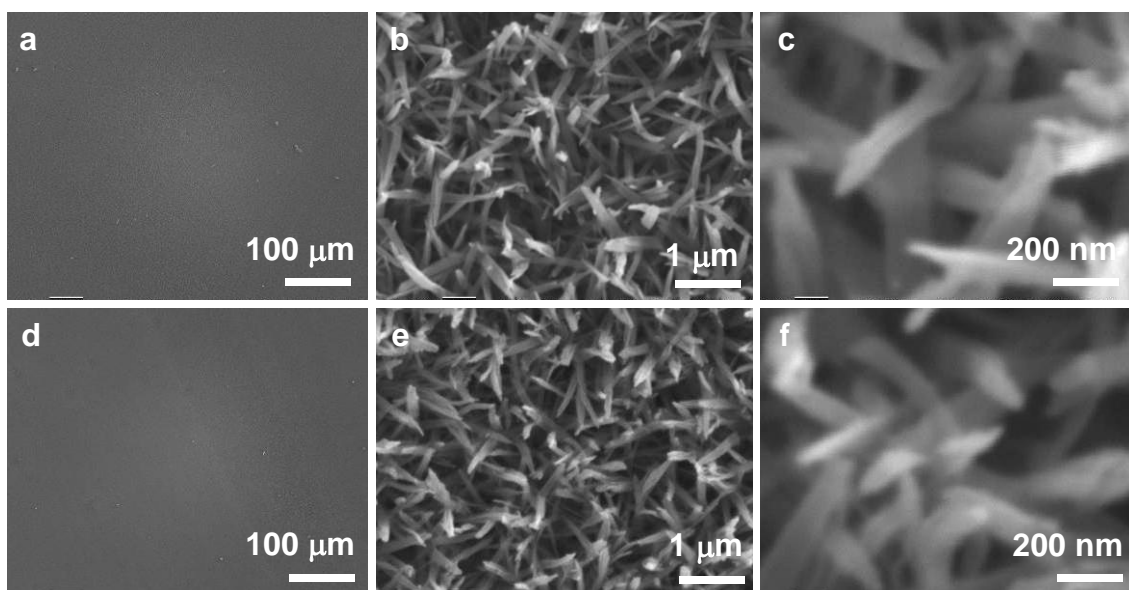

**Figure S2:** SEM images of LPEI@silica nanograss surface functionalized with porphyrin moiety with molar ratio of  $[EI]/[TSPP] = 600/1$  (a–c) and  $1200/1$  (d–f). The other synthesis conditions are the same as those used for the sample shown in Figure 7.

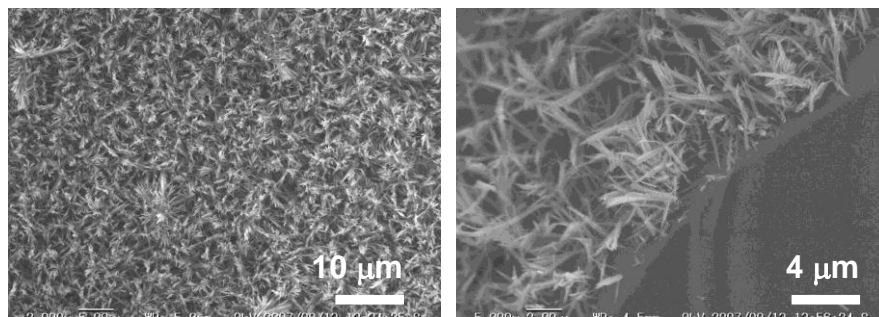

**Figure S3:** SEM images of LPEI@silica nanoglass surface used for the generation of Au nanoparticles.

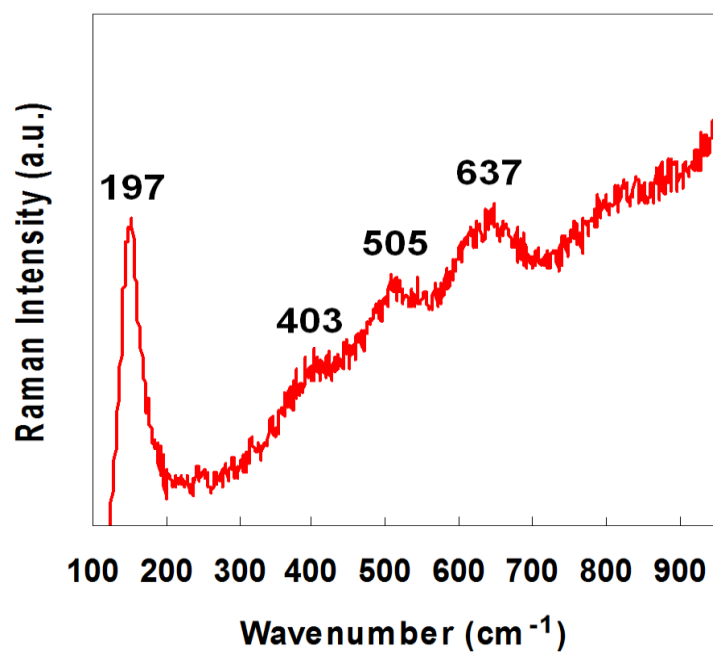

**Figure S4:** Raman spectrum of silica@titania composite nanograss surface.

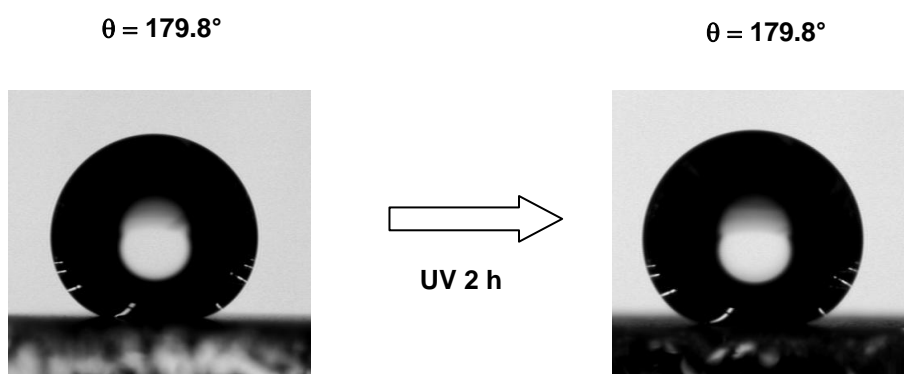

**Figure S5:** Water contact angles of silica nanoglass surface (as shown in Figure 9a and b) before and after 2 h UV irradiation.

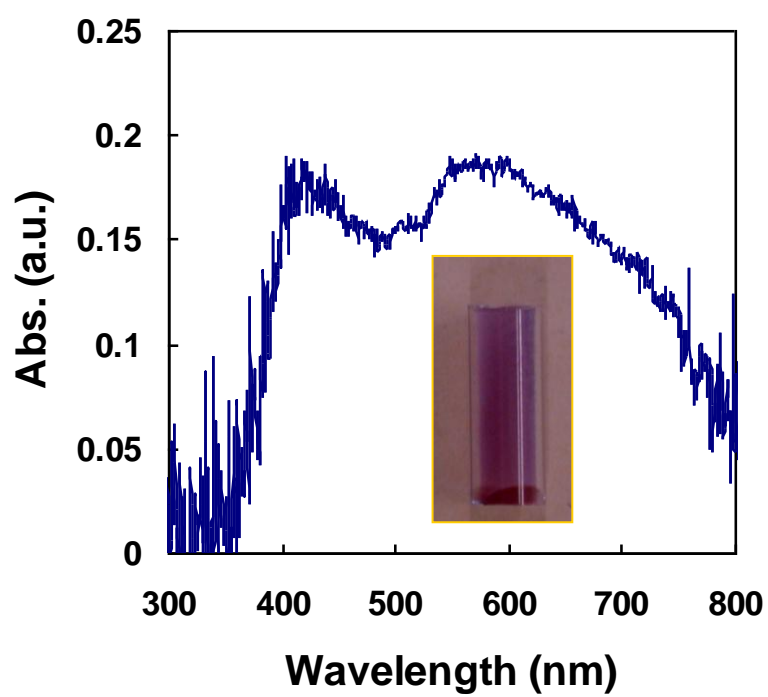

**Figure S6:** UV-vis spectrum of LPEI@silica nanograss functionalized with nanoparticles.
